# Supplementary material
Source: PubMed Central journal article supplement (PMC4613877)
Supplement: ry142551suppa1.pdf [file ry142551suppa1.pdf]

**Table E1. Univariate Correlation Coefficients between Cardiovascular Risk Factors and Proximal Plaque Volume Index and Proximal Noncalcified Plaque Index**

| Parameter                   | Proximal Total Plaque Volume Index |                | Proximal Noncalcified Plaque Volume Index |                |
|-----------------------------|------------------------------------|----------------|-------------------------------------------|----------------|
|                             | $\beta$ Value                      | <i>P</i> Value | $\beta$ Value                             | <i>P</i> Value |
| Age                         | 0.05                               | .39            | -0.01                                     | .84            |
| Male sex                    | 4.55                               | <.0001         | 2.61                                      | <.0001         |
| Diagnosis of hypertension   | 1.77                               | .03            | 0.75                                      | .18            |
| LDL cholesterol level       | -0.009                             | .53            | 0.007                                     | .50            |
| HDL cholesterol level       | -0.05                              | .01            | -0.03                                     | .03            |
| Simvastatin dose equivalent | 0.20                               | .03            | 0.03                                      | .62            |
| History of smoking          | 0.05                               | .96            | 0.41                                      | .47            |
| Family history of CAD       | -0.26                              | .78            | 0.67                                      | .27            |
| Creatinine level            | 5.59                               | .01            | 4.47                                      | <.01           |
| Diagnosis of diabetes       | 0.89                               | .62            | 1.88                                      | .12            |
| Framingham Risk Score       | 0.38                               | <.0001         | 0.27                                      | <.0001         |
| AHA 2013 risk score         | 0.20                               | <.001          | 0.11                                      | <.01           |

Note.—Proximal total plaque and proximal noncalcified plaque indexes were adjusted for lumen attenuation and body size (height).

**Table E2. Multivariable Analysis of Cardiovascular Risk Factors in Relationship to Proximal Plaque Volume Index, Proximal Noncalcified Plaque Index, and Proximal Calcified Plaque Index**

| Parameter                   | Proximal Plaque Volume Index |              |                | Proximal Noncalcified Plaque Index |             |                | Proximal Calcified Plaque Index |             |                |
|-----------------------------|------------------------------|--------------|----------------|------------------------------------|-------------|----------------|---------------------------------|-------------|----------------|
|                             | $\beta$ Value                | 95% CI       | <i>P</i> Value | $\beta$ Value                      | 95% CI      | <i>P</i> Value | $\beta$ Value                   | 95% CI      | <i>P</i> Value |
| Age                         | 0.08                         | -0.04, 0.19  | .27            | 0.03                               | -0.05, 0.11 | .53            | 0.06                            | -0.01, 0.14 | .16            |
| Male sex                    | 3.26                         | 1.10, 5.43   | .01            | 1.32                               | -0.13, 2.78 | .14            | 2.19                            | 0.76, 3.63  | .01            |
| Diagnosis of hypertension   | 0.91                         | -0.44, 2.27  | .27            | 0.18                               | -0.73, 1.09 | .75            | 0.71                            | -0.19, 1.61 | .20            |
| Systolic blood pressure     | 0.40                         | -0.10, 0.88  | .19            | 0.40                               | 0.07, 0.73  | .05            | -0.01                           | -0.33, 0.31 | .96            |
| LDL cholesterol level       | 0.02                         | -0.005, 0.04 | .20            | 0.02                               | 0.007, 0.04 | .02            | 0.001                           | -0.01, 0.02 | .90            |
| HDL cholesterol level       | -0.03                        | -0.06, 0.009 | .23            | -0.01                              | -0.04, 0.01 | .33            | -0.006                          | -0.03, 0.02 | .66            |
| Simvastatin dose equivalent | 0.18                         | 0.008, 0.35  | .09            | 0.03                               | -0.09, 0.14 | .69            | 0.09                            | -0.02, 0.20 | .18            |
| History of smoking          | 0.35                         | -1.08, 1.78  | .69            | 0.28                               | -0.68, 1.24 | .63            | 0.02                            | -0.93, 0.96 | .98            |
| Family history of CAD       | -0.17                        | -1.63, 1.30  | .85            | 0.75                               | -0.23, 1.73 | .21            | -0.49                           | -1.45, 0.48 | .41            |
| Creatinine level            | -1.26                        | -5.50, 2.99  | .63            | 0.96                               | -1.89, 3.82 | .58            | -1.16                           | -3.97, 1.65 | .50            |
| Diagnosis of diabetes       | 2.08                         | -0.74, 4.89  | .23            | 2.49                               | 0.59, 4.38  | .03            | 0.23                            | -1.63, 2.09 | .84            |

Note.—CI = confidence interval.
